# Supplementary material for: A new polymorph of Na2MnP2O7 as a 3.6 V cathode material for sodium-ion batteries
Source: Royal Society of Chemistry journal article supplement (doi:10.1039/c3ta10210f), 2013-01-01
Supplement: c3ta10210f.pdf [file c3ta10210f.pdf]

## Supporting Information

### A New Polymorph of Na<sub>2</sub>MnP<sub>2</sub>O<sub>7</sub> as a 3.6 V Cathode Material for Sodium-ion Batteries

Prabeer Barpanda,<sup>\*†‡</sup> Tian Ye,<sup>†</sup> Maxim Avdeev,<sup>§</sup> Sai-Cheong Chung,<sup>†</sup> Atsuo Yamada<sup>\*†‡</sup>

<sup>†</sup> Department of Chemical System Engineering, The University of Tokyo,  
7-3-1 Hongo, Bunkyo-ku, Tokyo 113-8656, Japan

<sup>‡</sup> Unit of Elements Strategy Initiative for Catalysts & Batteries, ESICB,  
Kyoto University, Kyoto 615-8510, Japan

<sup>§</sup> Bragg Institute, B87, Australian Nuclear Science and Technology Organization,  
Locked Bag 2001, Kirrawee DC NSW 2232, Australia

---

#### Calculation & Experimental Details:

**Computational Method:** All the first principle calculations were performed with the Vienna *ab initio* simulation package VASP.<sup>1</sup> The core electrons were treated with the projector augmented wave method as implemented in the VASP code. The GGA exchange-correlation functional employed was due to Perdew, Burke, and Ernzerhof (PBE). Rotationally invariant, spherically averaged version of Hubbard-type correction (+U) was used to characterize the local electrons. We employed effective coulomb energy U = 4.2 for the Fe atom. For the planewave expansion of wave function a cutoff of 520 eV was used. Integration over the Brillouin zone was performed with a Monkhorst-Pack k-point mesh of 2x2x2. For singly sodiated structure NaMnP<sub>2</sub>O<sub>7</sub>, ordering of sodium within a unit cell of 8 formula units were considered. The derivative structures were generated and the 15 structures with the lowest electrostatic energies were then computed with *ab initio* method, the resulting lowest energy structure was employed for voltage calculation according to:

$$\text{Voltage} = [ E(\text{NaMnP}_2\text{O}_7) + E(\text{Li}) ] - E(\text{Na}_2\text{MnP}_2\text{O}_7)$$

**Material Synthesis:** The  $\beta$ - $\text{Na}_2\text{MnP}_2\text{O}_7$  polymorph was prepared by conventional solid-state synthesis using a stoichiometric mixture of  $\text{NaH}_2\text{PO}_4$  (Wako, 99%) and  $\text{MnC}_2\text{O}_4$  (Kojundo, 99+%). The precursors were intimately mixed by wet planetary ball-milling in acetone media for 3 h (600 rpm) employing Cr-hardened stainless steel (Cr-SS) milling media and container. The precursor mixture was then pressed into pellets, quickly ramped up to 600 °C (rate = 10 °C/min) and were sintered for 6~12 h in a tubular furnace under steady argon flow to obtain the desired phase.

Alternately, the  $\beta$ - $\text{Na}_2\text{MnP}_2\text{O}_7$  polymorph was prepared by solution combustion synthesis<sup>1</sup> by dissolving stoichiometric amounts of  $\text{NaH}_2\text{PO}_4$  and  $\text{Mn}(\text{CH}_3\text{COO})_2 \cdot 4\text{H}_2\text{O}$  (Wako, 99.9%) or  $\text{Mn}(\text{NO}_3)_2 \cdot 6\text{H}_2\text{O}$  (Sigma-Aldrich, 99%) with citric acid ( $\text{C}_6\text{H}_8\text{O}_7$ ) (Wako, 98%) as combustion agent. Continuous heating (at 120 °C) of this solution led to the formation of an amorphous intermediate complex, which was later annealed at 600 °C for 1~6 h under steady argon flow to obtain the end product. Combustion route is capable of yielding the final product by a quick 1-minute annealing, but longer annealing was performed to improve crystallinity. Further, combustion synthesis leads to the one-step formation of nanoscale carbon-coated product.<sup>2</sup>

**Structural Analysis:** X-ray diffraction patterns of polycrystalline  $\text{Na}_2\text{MnP}_2\text{O}_7$  powders were acquired by a Rigaku RINT-TTR III powder diffractometer (operating at 50 kV, 300 mA) equipped with a Cu  $K\alpha$  source ( $\lambda_1 = 1.54056 \text{ \AA}$ ,  $\lambda_2 = 1.54439 \text{ \AA}$ ). A typical scan was performed in the  $2\theta$  range of 5~80° (step size = 0.03°.sec<sup>-1</sup>). Full powder pattern matching and Rietveld refinement were performed using FullProf software.<sup>3</sup>

**Physical Analyses:** Scanning electron micrographs were obtained on combustion synthesized  $\text{Na}_2\text{MnP}_2\text{O}_7$  powder sample mounted on conducting carbon paste using a Hitachi S-4800 SEM unit operating at 2 kV. Infra-red spectroscopy was conducted using a JASCO FT/IT-6300 FTIR instrument over the range 400~4000  $\text{cm}^{-1}$ . Typically, an average of 32 scans were obtained (step size = 4.0  $\text{cm}^{-1}$ ). Thermal analysis was performed with a Seiko EXSTAR 6000 instrument in the temperature range of 25~800 °C at a moderate heating rate of 5° C/min.

**Electrochemical Analyses:** For electrochemical measurements, the working electrode (cathode) was formulated by mixing combustion-synthesized  $\text{Na}_2\text{MnP}_2\text{O}_7$ , acetylene carbon black and polyvinylidene difluoride (PVdF) in w/w ratio of 70/20/10. This working electrode composite was pressed on an Al mesh working as the current collector, with an average cathode loading of  $3 \text{ mg/cm}^2$ . Coin cells were assembled inside an Ar-filled glove box by taking the cathode film as the working electrode, Na metal foils as counter electrode and 1 M  $\text{NaClO}_4$  dissolved in propylene carbonate (PC) acting as electrolyte. The electrolyte (trade name: LIPASTE-P/S1) was commercially procured from Tomiyama High Purity Chemicals Ltd. (Tokyo, Japan). Galvanostatic cycling was conducted in the voltage range 2 ~ 4.5 V at a rate of C/20 (at 25 °C).

#### References:

1. Kresse, G.; Furthmüller, J. *Phys. Rev. B* **1996**, *54*, 11169.
2. Barpanda, P.; Ye, T.; Chung, S.C.; Yamada, Y.; Nishimura, S.; Yamada, A. *J. Mater. Chem.* **2012**, *22*, 13455.
3. Rodriguez-Carvajal, J. *Physica B* **1993**, *192*, 55.

**Table S1.** Crystallographic data of  $\beta\text{-Na}_2\text{MnP}_2\text{O}_7$  polymorph derived from the Rietveld refinement of the X-ray powder diffraction pattern acquired at room temperature. The lattice parameters, atomic coordinates and equivalent isotropic displacement coefficients of  $\text{Na}_2\text{MnP}_2\text{O}_7$  polymorph with triclinic (*P1*) symmetry are listed.

---

|                    |                         |                            |
|--------------------|-------------------------|----------------------------|
| $a$ (Å) = 9.92230  | $\alpha$ (°) = 148.3870 | space group = <i>P1</i>    |
| $b$ (Å) = 11.08390 | $\beta$ (°) = 121.9450  | Rp = 8.48 %, Rwp = 12.34 % |
| $c$ (Å) = 12.47260 | $\gamma$ (°) = 68.4230  | $\chi^2$ = 9.08 %          |

| Atom | Wyckoff | x       | y        | z        | Occupancy | B (iso) | Symmetry |
|------|---------|---------|----------|----------|-----------|---------|----------|
| Mn1  | 1a      | 0.49320 | 0.42940  | 0.15810  | 1.000     | 1.000   | 1        |
| Mn2  | 1a      | 0.90020 | 0.86270  | 0.64380  | 1.000     | 1.000   | 1        |
| Mn3  | 1a      | 0.49890 | 0.60150  | 0.86500  | 1.000     | 1.000   | 1        |
| Mn4  | 1a      | 0.11150 | 0.19060  | 0.40020  | 1.000     | 1.000   | 1        |
| P1   | 1a      | 0.17400 | 0.33800  | 0.12100  | 1.000     | 1.000   | 1        |
| P2   | 1a      | 0.70600 | 0.73100  | 0.27000  | 1.000     | 1.000   | 1        |
| P3   | 1a      | 0.19300 | 0.53100  | 0.49000  | 1.000     | 1.000   | 1        |
| P4   | 1a      | 0.44900 | 0.00400  | 0.31600  | 1.000     | 1.000   | 1        |
| P5   | 1a      | 0.83800 | 0.68900  | 0.90700  | 1.000     | 1.000   | 1        |
| P6   | 1a      | 0.28940 | 0.25100  | 0.70100  | 1.000     | 1.000   | 1        |
| P7   | 1a      | 0.80000 | 0.46600  | 0.50500  | 1.000     | 1.000   | 1        |
| P8   | 1a      | 0.54600 | -0.01900 | 0.66200  | 1.000     | 1.000   | 1        |
| Na1  | 1a      | 0.84700 | 0.11600  | 0.45400  | 1.000     | 1.000   | 1        |
| Na2  | 1a      | 0.14200 | 0.91200  | 0.57800  | 1.000     | 1.000   | 1        |
| Na3  | 1a      | 0.85500 | 0.14100  | 0.04900  | 1.000     | 1.000   | 1        |
| Na4  | 1a      | 0.15400 | 0.78400  | 0.92600  | 1.000     | 1.000   | 1        |
| Na5  | 1a      | 0.17400 | 0.68300  | 0.14900  | 1.000     | 1.000   | 1        |
| Na6  | 1a      | 0.81400 | 0.33300  | 0.85700  | 1.000     | 1.000   | 1        |
| Na7  | 1a      | 0.53400 | -0.00700 | -0.02000 | 1.000     | 1.000   | 1        |
| Na8  | 1a      | 0.48300 | 0.27200  | 0.31700  | 1.000     | 1.000   | 1        |
| O1   | 1a      | 0.26500 | 0.44100  | 0.34500  | 1.000     | 1.000   | 1        |
| O2   | 1a      | 0.32100 | 0.64100  | 0.70300  | 1.000     | 1.000   | 1        |
| O3   | 1a      | 0.08600 | 0.29400  | 0.30200  | 1.000     | 1.000   | 1        |
| O4   | 1a      | 0.09600 | 0.72200  | 0.57300  | 1.000     | 1.000   | 1        |
| O5   | 1a      | 0.30000 | 0.19500  | 0.01600  | 1.000     | 1.000   | 1        |
| O6   | 1a      | 0.06500 | 0.48800  | 0.13000  | 1.000     | 1.000   | 1        |
| O7   | 1a      | 0.03000 | 0.15700  | -0.03600 | 1.000     | 1.000   | 1        |
| O8   | 1a      | 0.53600 | 0.81900  | 0.27700  | 1.000     | 1.000   | 1        |
| O9   | 1a      | 0.72900 | 0.57000  | 0.25400  | 1.000     | 1.000   | 1        |
| O10  | 1a      | 0.85400 | 0.95300  | 0.50200  | 1.000     | 1.000   | 1        |
| O11  | 1a      | 0.68000 | 0.60000  | 0.05000  | 1.000     | 1.000   | 1        |
| O12  | 1a      | 0.48200 | 0.97100  | 0.18400  | 1.000     | 1.000   | 1        |
| O13  | 1a      | 0.27000 | 0.94900  | 0.23800  | 1.000     | 1.000   | 1        |
| O14  | 1a      | 0.54200 | 0.26200  | 0.56000  | 1.000     | 1.000   | 1        |
| O15  | 1a      | 0.74200 | 0.55900  | 0.66500  | 1.000     | 1.000   | 1        |
| O16  | 1a      | 0.66800 | 0.36300  | 0.30400  | 1.000     | 1.000   | 1        |
| O17  | 1a      | 0.92300 | 0.31500  | 0.49100  | 1.000     | 1.000   | 1        |
| O18  | 1a      | 0.88400 | 0.67000  | 0.62400  | 1.000     | 1.000   | 1        |
| O19  | 1a      | 0.71100 | 0.78100  | 0.99900  | 1.000     | 1.000   | 1        |
| O20  | 1a      | 0.87500 | 0.47200  | 0.82000  | 1.000     | 1.000   | 1        |
| O21  | 1a      | 0.93600 | 0.91300  | 0.05700  | 1.000     | 1.000   | 1        |
| O22  | 1a      | 0.45600 | 0.14900  | 0.68100  | 1.000     | 1.000   | 1        |
| O23  | 1a      | 0.14900 | 0.02200  | 0.46200  | 1.000     | 1.000   | 1        |
| O24  | 1a      | 0.26300 | 0.37300  | 0.88600  | 1.000     | 1.000   | 1        |
| O25  | 1a      | 0.31000 | 0.42400  | 0.74900  | 1.000     | 1.000   | 1        |
| O26  | 1a      | 0.72500 | 0.05700  | 0.75900  | 1.000     | 1.000   | 1        |
| O27  | 1a      | 0.51800 | 0.06900  | 0.82900  | 1.000     | 1.000   | 1        |
| O28  | 1a      | 0.43900 | 0.73700  | 0.42600  | 1.000     | 1.000   | 1        |

**Table S2.** Selected bond lengths and bond valence sum (BVS) values of  $\beta$ - $\text{Na}_2\text{MnP}_2\text{O}_7$ .

|          |         |              |          |         |              |
|----------|---------|--------------|----------|---------|--------------|
| Mn1-O5:  | 2.4065Å | s=0.1980v.u. | Mn2-O4:  | 2.0562Å | s=0.4102v.u. |
| Mn1-O9:  | 2.4246Å | s=0.1907v.u. | Mn2-O7:  | 1.9255Å | s=0.5383v.u. |
| Mn1-O16: | 2.2054Å | s=0.3008v.u. | Mn2-O9:  | 2.3446Å | s=0.2252v.u. |
| Mn1-O24: | 2.5218Å | s=0.1558v.u. | Mn2-O10: | 2.4818Å | s=0.1693v.u. |
| Mn1-O27: | 2.2989Å | s=0.2477v.u. | Mn2-O18: | 1.9902Å | s=0.4705v.u. |
| Mn1-O28: | 2.0562Å | s=0.4102v.u. | Mn2-O26: | 2.0842Å | s=0.3870v.u. |

-----  
**BV-sum of Mn1: 1.6344v.u.**

-----  
**BV-sum of Mn2: 2.3183v.u.**

|          |         |              |          |         |              |
|----------|---------|--------------|----------|---------|--------------|
| Mn3-O2:  | 2.1341Å | s=0.3489v.u. | Mn4-O3:  | 2.1742Å | s=0.3209v.u. |
| Mn3-O8:  | 3.1472Å | s=0.0425v.u. | Mn4-O13: | 2.1861Å | s=0.3131v.u. |
| Mn3-O11: | 2.0516Å | s=0.4141v.u. | Mn4-O17: | 2.0898Å | s=0.3826v.u. |
| Mn3-O12: | 2.2536Å | s=0.2721v.u. | Mn4-O21: | 2.1078Å | s=0.3684v.u. |
| Mn3-O14: | 2.2296Å | s=0.2861v.u. | Mn4-O23: | 2.4215Å | s=0.1920v.u. |
| Mn3-O19: | 2.2079Å | s=0.2993v.u. | Mn4-O25: | 2.2382Å | s=0.2810v.u. |
| Mn3-O25: | 2.1146Å | s=0.3633v.u. |          |         |              |

-----  
**BV-sum of Mn3: 2.1301v.u.**

-----  
**BV-sum of Mn4: 1.9931v.u.**

|        |         |              |         |         |              |
|--------|---------|--------------|---------|---------|--------------|
| P1-O1: | 1.6064Å | s=1.0326v.u. | P2-O8:  | 1.6140Å | s=1.0147v.u. |
| P1-O5: | 1.5906Å | s=1.0706v.u. | P2-O9:  | 1.5552Å | s=1.1609v.u. |
| P1-O6: | 1.5603Å | s=1.1474v.u. | P2-O10: | 1.6180Å | s=1.0054v.u. |
| P1-O7: | 1.5353Å | s=1.2149v.u. | P2-O11: | 1.5635Å | s=1.1389v.u. |

-----  
**BV-sum of P1: 4.5802v.u.**

-----  
**BV-sum of P2: 4.4312v.u.**

|        |         |              |         |         |              |
|--------|---------|--------------|---------|---------|--------------|
| P3-O1: | 1.5958Å | s=1.0579v.u. | P4-O8:  | 1.6217Å | s=0.9970v.u. |
| P3-O2: | 1.4863Å | s=1.3592v.u. | P4-O12: | 1.5519Å | s=1.1697v.u. |
| P3-O3: | 1.5657Å | s=1.1332v.u. | P4-O13: | 1.5590Å | s=1.1509v.u. |
| P3-O4: | 1.5175Å | s=1.2654v.u. | P4-O14: | 1.5611Å | s=1.1452v.u. |

-----  
**BV-sum of P3: 4.9170v.u.**

-----  
**BV-sum of P4: 4.5800v.u.**

|         |         |              |         |         |              |
|---------|---------|--------------|---------|---------|--------------|
| P5-O15: | 1.6289Å | s=0.9806v.u. | P6-O22: | 1.6293Å | s=0.9798v.u. |
| P5-O19: | 1.5927Å | s=1.0655v.u. | P6-O23: | 1.6089Å | s=1.0267v.u. |
| P5-O20: | 1.5570Å | s=1.1561v.u. | P6-O24: | 1.5119Å | s=1.2816v.u. |
| P5-O21: | 1.5966Å | s=1.0559v.u. | P6-O25: | 1.5102Å | s=1.2868v.u. |

-----  
**BV-sum of P5: 4.3648v.u.**

-----  
**BV-sum of P6: 4.7061v.u.**

P7-O15: 1.6283Å s=0.9819v.u.  
P7-O16: 1.4332Å s=1.5347v.u.  
P7-O17: 1.5958Å s=1.0579v.u.  
P7-O18: 1.5399Å s=1.2023v.u.

-----  
**BV-sum of P7: 4.8675v.u.**

Na1-O10: 2.3094Å s=0.2122v.u.  
Na1-O12: 3.0326Å s=0.0473v.u.  
Na1-O15: 3.0415Å s=0.0465v.u.  
Na1-O17: 2.1836Å s=0.2755v.u.  
Na1-O19: 2.7396Å s=0.0869v.u.  
Na1-O20: 2.2958Å s=0.2183v.u.  
Na1-O23: 2.7639Å s=0.0827v.u.

-----  
**BV-sum of Na1: 1.1092v.u.**

Na3-O3: 2.0439Å s=0.3681v.u.  
Na3-O7: 2.5817Å s=0.1206v.u.  
Na3-O9: 3.0022Å s=0.0504v.u.  
Na3-O16: 3.0283Å s=0.0478v.u.  
Na3-O18: 2.9684Å s=0.0541v.u.  
Na3-O21: 2.4275Å s=0.1661v.u.  
Na3-O26: 2.4133Å s=0.1711v.u.  
Na3-O27: 2.8055Å s=0.0758v.u.

-----  
**BV-sum of Na3: 1.1466v.u.**

Na5-O6: 2.5442Å s=0.1304v.u.  
Na5-O13: 2.4909Å s=0.1456v.u.  
Na5-O20: 2.6429Å s=0.1062v.u.  
Na5-O23: 2.1854Å s=0.2745v.u.  
Na5-O24: 2.2322Å s=0.2491v.u.  
Na5-O28: 2.6890Å s=0.0965v.u.

-----  
**BV-sum of Na5: 1.1306v.u.**

Na7-O2: 2.6466Å s=0.1054v.u.  
Na7-O5: 2.4846Å s=0.1476v.u.  
Na7-O12: 3.0558Å s=0.0451v.u.  
Na7-O16: 2.2393Å s=0.2455v.u.  
Na7-O19: 2.4769Å s=0.1499v.u.  
Na7-O27: 2.5631Å s=0.1254v.u.

-----  
**BV-sum of Na7: 0.9157v.u.**

P8-O22: 1.6032Å s=1.0401v.u.  
P8-O26: 1.5551Å s=1.1611v.u.  
P8-O27: 1.5231Å s=1.2494v.u.  
P8-O28: 1.5335Å s=1.2199v.u.

-----  
**BV-sum of P8: 4.7711v.u.**

Na2-O4: 2.2584Å s=0.2359v.u.  
Na2-O5: 2.7402Å s=0.0868v.u.  
Na2-O6: 2.6999Å s=0.0944v.u.  
Na2-O10: 2.4866Å s=0.1469v.u.  
Na2-O23: 2.5995Å s=0.1162v.u.  
Na2-O24: 2.9166Å s=0.0602v.u.

-----  
**BV-sum of Na2: 0.9033v.u.**

Na4-O2: 2.9036Å s=0.0619v.u.  
Na4-O12: 2.7860Å s=0.0790v.u.  
Na4-O13: 2.1213Å s=0.3135v.u.  
Na4-O17: 3.0462Å s=0.0460v.u.  
Na4-O18: 2.5821Å s=0.1205v.u.  
Na4-O21: 2.6228Å s=0.1108v.u.  
Na4-O25: 2.6946Å s=0.0954v.u.

-----  
**BV-sum of Na4: 0.9654v.u.**

Na6-O6: 2.2266Å s=0.2520v.u.  
Na6-O7: 2.9176Å s=0.0601v.u.  
Na6-O10: 2.5237Å s=0.1360v.u.  
Na6-O11: 2.1633Å s=0.2874v.u.  
Na6-O14: 2.7646Å s=0.0825v.u.  
Na6-O20: 2.2683Å s=0.2311v.u.  
Na6-O26: 2.4715Å s=0.1516v.u.

-----  
**BV-sum of Na6: 1.3179v.u.**

Na8-O1: 2.2394Å s=0.2454v.u.  
Na8-O5: 2.5668Å s=0.1244v.u.  
Na8-O12: 2.1126Å s=0.3192v.u.  
Na8-O14: 2.8615Å s=0.0675v.u.  
Na8-O15: 2.5011Å s=0.1426v.u.  
Na8-O16: 2.5235Å s=0.1361v.u.

-----  
**BV-sum of Na8: 1.1513v.u.**

P1-O1: 1.6064Å s=1.0326v.u.  
P3-O1: 1.5958Å s=1.0579v.u.  
Na8-O1: 2.2394Å s=0.2454v.u.

-----  
**BV-sum of O1: 2.4309v.u.**

Mn4-O3: 2.1742Å s=0.3209v.u.  
P3-O3: 1.5658Å s=1.1331v.u.  
Na3-O3: 2.0439Å s=0.3681v.u.

-----  
**BV-sum of O3: 1.9483v.u.**

Mn1-O5: 2.4065Å s=0.1980v.u.  
P1-O5: 1.5906Å s=1.0706v.u.  
Na2-O5: 2.7402Å s=0.0868v.u.  
Na7-O5: 2.4845Å s=0.1476v.u.  
Na8-O5: 2.5669Å s=0.1244v.u.

-----  
**BV-sum of O5: 1.6786v.u.**

Mn2-O7: 1.9255Å s=0.5383v.u.  
P1-O7: 1.5354Å s=1.2148v.u.  
Na3-O7: 2.5817Å s=0.1206v.u.  
Na6-O7: 2.9176Å s=0.0601v.u.

-----  
**BV-sum of O7: 2.0190v.u.**

Mn1-O9: 2.4246Å s=0.1907v.u.  
Mn2-O9: 2.3446Å s=0.2252v.u.  
P2-O9: 1.5551Å s=1.1610v.u.  
Na3-O9: 3.0022Å s=0.0504v.u.

-----  
**BV-sum of O9: 1.6999v.u.**

Mn3-O11: 2.0516Å s=0.4141v.u.  
P2-O11: 1.5635Å s=1.1389v.u.  
Na6-O11: 2.1633Å s=0.2874v.u.

-----  
**BV-sum of O11: 1.9398v.u.**

Mn3-O2: 2.1340Å s=0.3489v.u.  
P3-O2: 1.4862Å s=1.3593v.u.  
Na4-O2: 2.9036Å s=0.0619v.u.  
Na7-O2: 2.6466Å s=0.1054v.u.

-----  
**BV-sum of O2: 1.9702v.u.**

Mn2-O4: 2.0561Å s=0.4103v.u.  
P3-O4: 1.5176Å s=1.2653v.u.  
Na2-O4: 2.2584Å s=0.2359v.u.

-----  
**BV-sum of O4: 2.0090v.u.**

P1-O6: 1.5603Å s=1.1473v.u.  
Na2-O6: 2.6999Å s=0.0944v.u.  
Na5-O6: 2.5443Å s=0.1304v.u.  
Na6-O6: 2.2267Å s=0.2520v.u.

-----  
**BV-sum of O6: 1.6889v.u.**

Mn3-O8: 3.1472Å s=0.0425v.u.  
P2-O8: 1.6140Å s=1.0147v.u.  
P4-O8: 1.6217Å s=0.9969v.u.

-----  
**BV-sum of O8: 2.2008v.u.**

Mn2-O10: 2.4818Å s=0.1693v.u.  
P2-O10: 1.6181Å s=1.0053v.u.  
Na1-O10: 2.3094Å s=0.2122v.u.  
Na2-O10: 2.4866Å s=0.1469v.u.  
Na6-O10: 2.5238Å s=0.1360v.u.

-----  
**BV-sum of O10: 1.7067v.u.**

Mn3-O12: 2.2536Å s=0.2721v.u.  
P4-O12: 1.5518Å s=1.1699v.u.  
Na1-O12: 3.0325Å s=0.0473v.u.  
Na4-O12: 2.7860Å s=0.0790v.u.  
Na7-O12: 3.0559Å s=0.0451v.u.  
Na8-O12: 2.1126Å s=0.3192v.u.

-----  
**BV-sum of O12: 1.9700v.u.**

Mn4-O13: 2.1861Å s=0.3131v.u.  
P4-O13: 1.5590Å s=1.1508v.u.  
Na4-O13: 2.1213Å s=0.3136v.u.  
Na5-O13: 2.4908Å s=0.1457v.u.

-----  
**BV-sum of O13: 1.9885v.u.**

P5-O15: 1.6289Å s=0.9806v.u.  
P7-O15: 1.6284Å s=0.9818v.u.  
Na1-O15: 3.0415Å s=0.0465v.u.  
Na8-O15: 2.5010Å s=0.1426v.u.

-----  
**BV-sum of O15: 2.2369v.u.**

Mn4-O17: 2.0898Å s=0.3826v.u.  
P7-O17: 1.5958Å s=1.0579v.u.  
Na1-O17: 2.1836Å s=0.2755v.u.  
Na4-O17: 3.0462Å s=0.0460v.u.

-----  
**BV-sum of O17: 1.8667v.u.**

Mn3-O19: 2.2079Å s=0.2993v.u.  
P5-O19: 1.5927Å s=1.0654v.u.  
Na1-O19: 2.7396Å s=0.0869v.u.  
Na7-O19: 2.4769Å s=0.1499v.u.

-----  
**BV-sum of O19: 1.6785v.u.**

Mn4-O21: 2.1078Å s=0.3685v.u.  
P5-O21: 1.5966Å s=1.0560v.u.  
Na3-O21: 2.4276Å s=0.1661v.u.  
Na4-O21: 2.6228Å s=0.1108v.u.

-----  
**BV-sum of O21: 1.7968v.u.**

Mn4-O23: 2.4214Å s=0.1920v.u.  
P6-O23: 1.6089Å s=1.0266v.u.  
Na1-O23: 2.7639Å s=0.0827v.u.  
Na2-O23: 2.5995Å s=0.1162v.u.  
Na5-O23: 2.1853Å s=0.2745v.u.

-----  
**BV-sum of O23: 1.7337v.u.**

Mn3-O14: 2.2296Å s=0.2861v.u.  
P4-O14: 1.5612Å s=1.1451v.u.  
Na6-O14: 2.7646Å s=0.0825v.u.  
Na8-O14: 2.8614Å s=0.0675v.u.

-----  
**BV-sum of O14: 1.6837v.u.**

Mn1-O16: 2.2054Å s=0.3008v.u.  
P7-O16: 1.4332Å s=1.5346v.u.  
Na3-O16: 3.0283Å s=0.0478v.u.  
Na7-O16: 2.2393Å s=0.2454v.u.  
Na8-O16: 2.5236Å s=0.1361v.u.

-----  
**BV-sum of O16: 2.3158v.u.**

Mn2-O18: 1.9902Å s=0.4705v.u.  
P7-O18: 1.5399Å s=1.2023v.u.  
Na3-O18: 2.9685Å s=0.0541v.u.  
Na4-O18: 2.5820Å s=0.1206v.u.

-----  
**BV-sum of O18: 1.9387v.u.**

P5-O20: 1.5569Å s=1.1562v.u.  
Na1-O20: 2.2958Å s=0.2183v.u.  
Na5-O20: 2.6429Å s=0.1062v.u.  
Na6-O20: 2.2683Å s=0.2311v.u.

-----  
**BV-sum of O20: 1.7768v.u.**

P6-O22: 1.6292Å s=0.9799v.u.  
P8-O22: 1.6032Å s=1.0401v.u.

-----  
**BV-sum of O22: 2.1940v.u.**

Mn1-O24: 2.5218Å s=0.1558v.u.  
P6-O24: 1.5120Å s=1.2816v.u.  
Na2-O24: 2.9166Å s=0.0602v.u.  
Na5-O24: 2.2322Å s=0.2491v.u.

-----  
**BV-sum of O24: 1.8171v.u.**



|          |         |              |          |         |              |
|----------|---------|--------------|----------|---------|--------------|
| Mn3-O25: | 2.1146Å | s=0.3633v.u. | Mn2-O26: | 2.0842Å | s=0.3870v.u. |
| Mn4-O25: | 2.2382Å | s=0.2810v.u. | P8-O26:  | 1.5551Å | s=1.1610v.u. |
| P6-O25:  | 1.5102Å | s=1.2869v.u. | Na3-O26: | 2.4133Å | s=0.1711v.u. |
| Na4-O25: | 2.6947Å | s=0.0954v.u. | Na6-O26: | 2.4715Å | s=0.1516v.u. |

-----  
**BV-sum of O25: 2.0984v.u.**

-----  
**BV-sum of O26: 1.9294v.u.**

|          |         |              |          |         |              |
|----------|---------|--------------|----------|---------|--------------|
| Mn1-O27: | 2.2989Å | s=0.2477v.u. | Mn1-O28: | 2.0562Å | s=0.4102v.u. |
| P8-O27:  | 1.5231Å | s=1.2493v.u. | P8-O28:  | 1.5336Å | s=1.2198v.u. |
| Na3-O27: | 2.8055Å | s=0.0758v.u. | Na5-O28: | 2.6890Å | s=0.0966v.u. |
| Na7-O27: | 2.5631Å | s=0.1254v.u. |          |         |              |

-----  
**BV-sum of O27: 1.7883v.u.**

-----  
**BV-sum of O28: 1.8328v.u.**

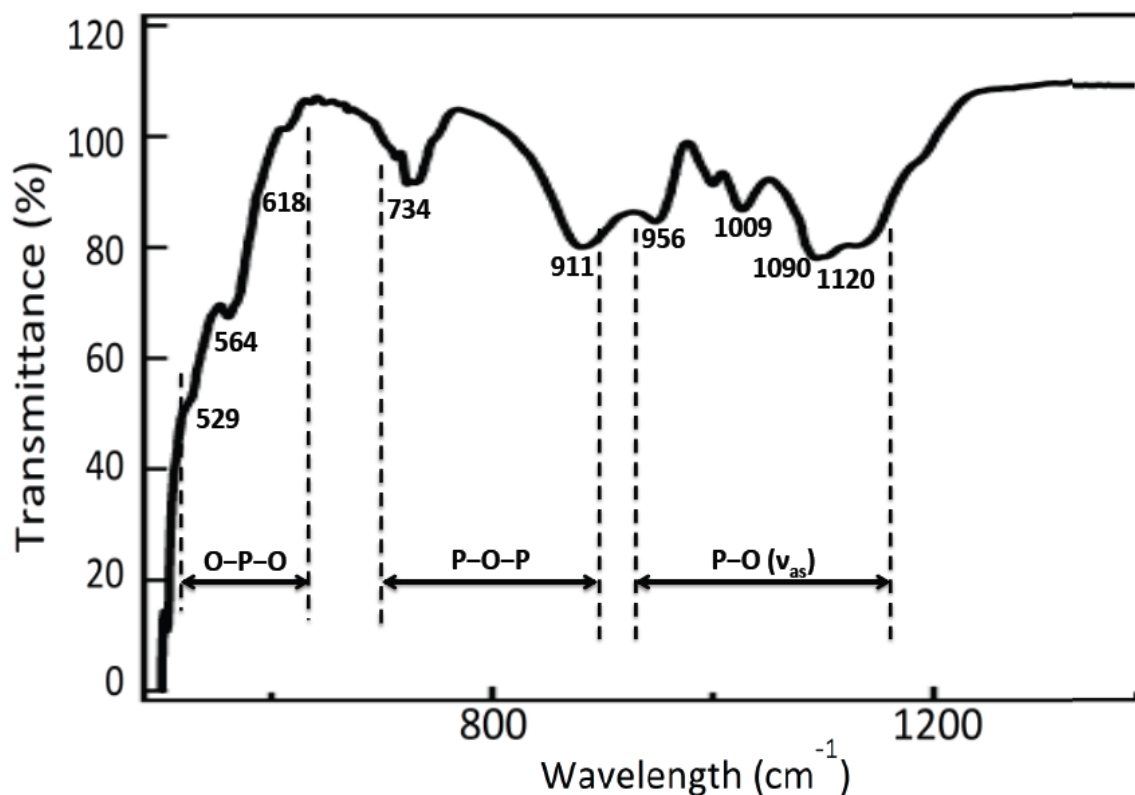

**Figure S1.** FT-IR spectrum of  $\beta$ - $\text{Na}_2\text{MnP}_2\text{O}_7$  polymorph, showing the classical P-O-P, O-P-O and P-O bands arising from the characteristics diphosphate ( $\text{P}_2\text{O}_7$ ) groups.

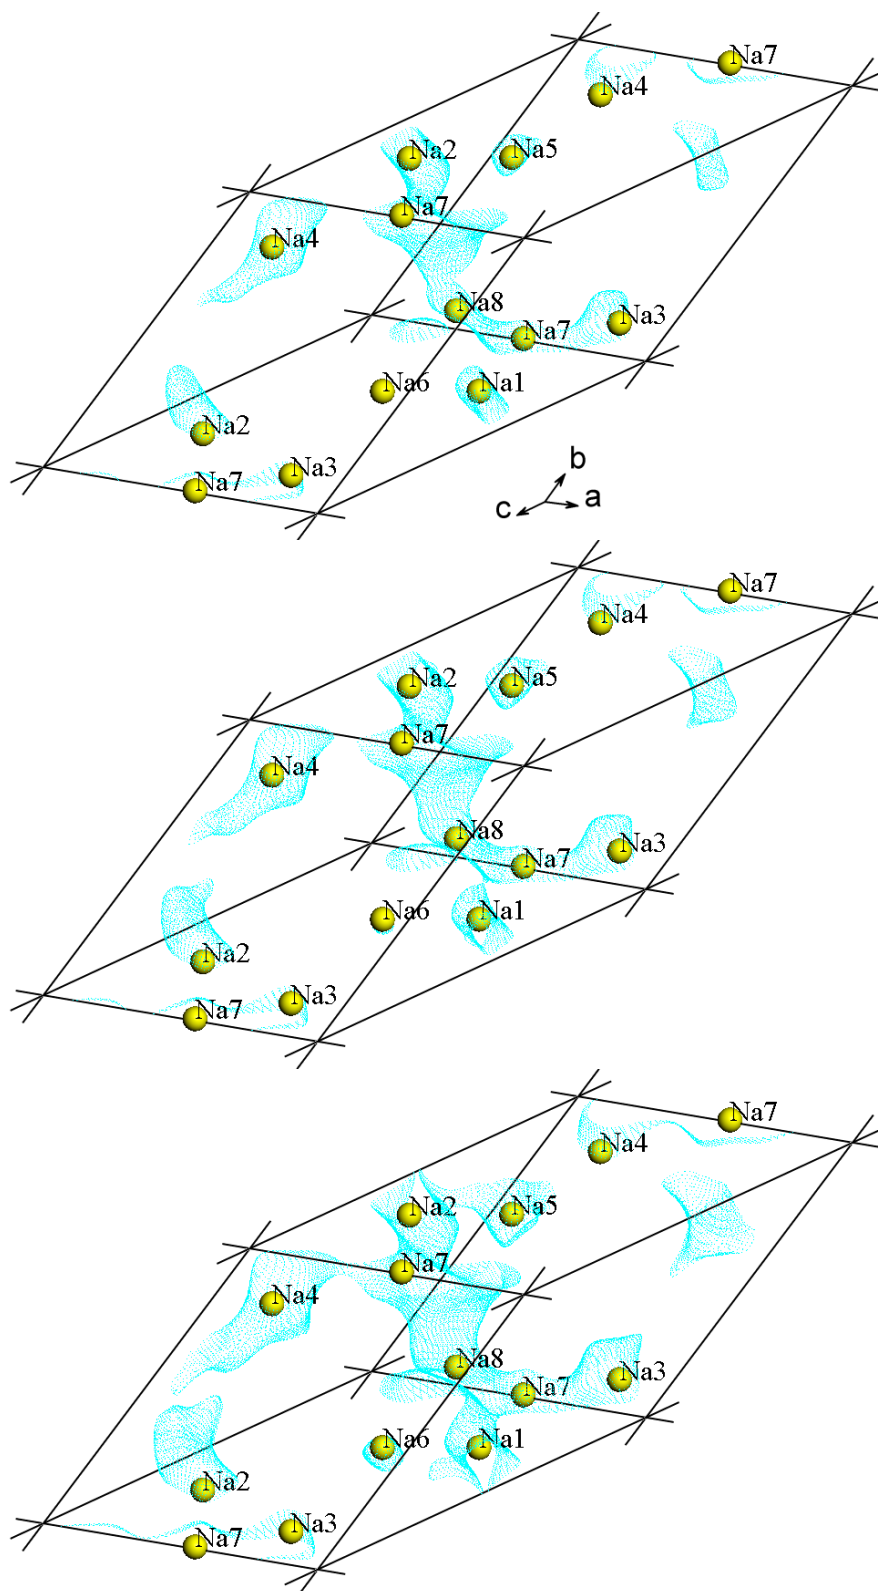

**Figure S2.** Bond-valence mismatch maps with isovalues 0.25, 0.35, and 0.45 from top to bottom, respectively. The most suitable  $\text{Na}^+$  diffusion pathways connect Na7-Na8-Na7 sites.

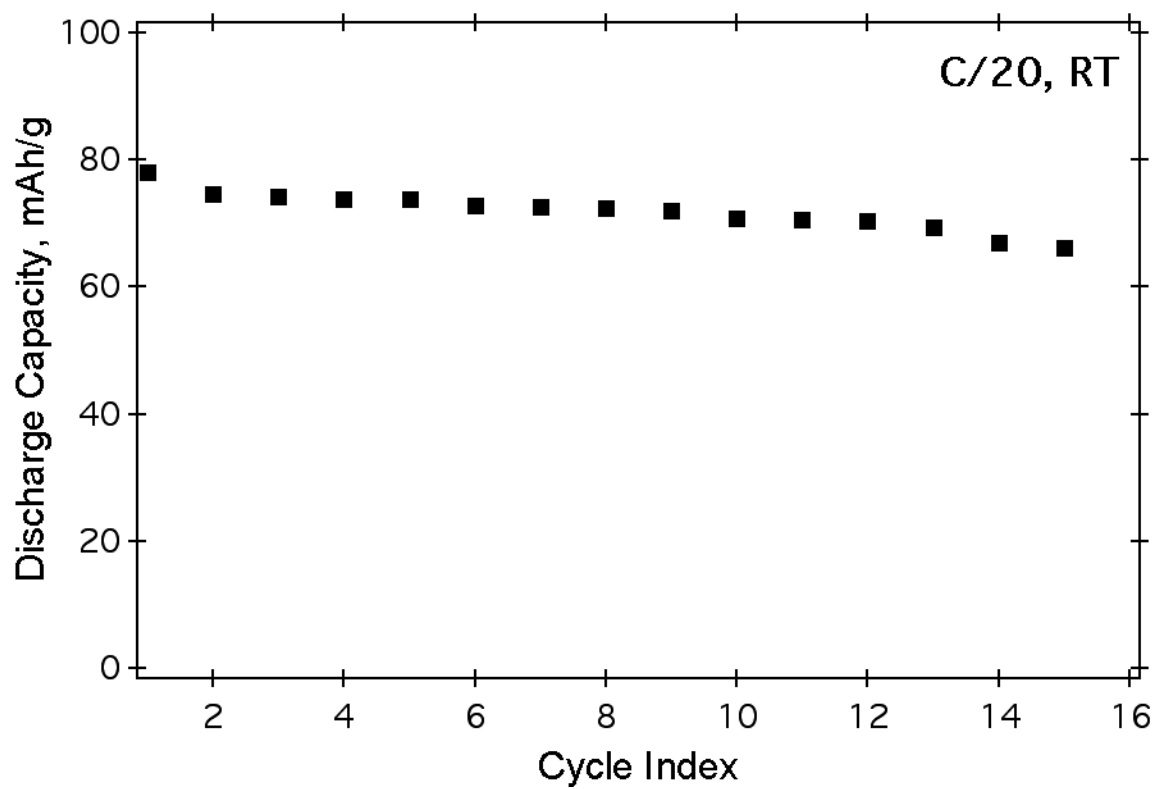

**Figure S3.** Initial cycling stability of  $\text{Na}_2\text{MnP}_2\text{O}_7$  cathode (at a rate of C/20 at 25 °C) shown for the first 15 cycles.
